# Supplementary material
Source: ML conference proceedings conference paper supplement (https://aclanthology.org/D19-1293)
Supplement: Attachment [file (CR-final)emnlp-ijcnlp-2019-supplementary.pdf › (CR-final)emnlp-ijcnlp-2019-supplementary.pdf]

# Nonsense!: Quality Control via Two-Step Reason Selection for Annotating Local Acceptability and Related Attributes in News Editorial (Supplementary Material)

Wonsuk Yang    Seungwon Yoon    Ada Carpenter    Jong C. Park<sup>†</sup>

School of Computing

Korea Advanced Institute of Science and Technology

{derrick0511, swyoon, ada, park}@nlp.kaist.ac.kr

## A The options for the reason selection

| Reason 1                                                  | Reason 2                                               | Label       |
|-----------------------------------------------------------|--------------------------------------------------------|-------------|
| It is not a factual information                           | It is a speculative or hypothetical statement          | natural     |
|                                                           | It is a vague (or not clear) statement                 | natural     |
|                                                           | It is a subjective statement                           | natural     |
|                                                           | I am not familiar with the topic                       | natural     |
|                                                           | It is widely known (or taught) around the world        | unnatural   |
| It is a subjective statement                              | It is a personal experience                            | natural     |
|                                                           | It is a subjective opinion / judgment / interpretation | natural     |
|                                                           | It is not a factual information                        | natural     |
|                                                           | I am not familiar with the topic                       | natural     |
|                                                           | It is a factual information                            | nonsensical |
| I am not familiar with the topic                          | I do not have background knowledge about the topic     | natural     |
|                                                           | It is not a factual information                        | natural     |
|                                                           | It is a subjective statement                           | natural     |
|                                                           | I am an expert on the subject                          | nonsensical |
|                                                           | The information is (almost) common-sense knowledge     | nonsensical |
| This sentence does not contain any meaningful information | It is a question                                       | natural     |
|                                                           | It is not a complete sentence                          | natural     |
|                                                           | It is a transition sentence that is meaningless        | natural     |
|                                                           | It is merely a word play or an analogy                 | natural     |
|                                                           | The information is (almost) common-sense knowledge     | nonsensical |

Table A.1: The options for the reason selection (attribute: Knowledge Awareness, attribute value: *I did not know the information*)

<sup>†</sup> Corresponding author

| Reason 1                                                                         | Reason 2                                                                         | Label       |
|----------------------------------------------------------------------------------|----------------------------------------------------------------------------------|-------------|
| The same information was stated in one of the previous sentences                 | I learned the information from the previous sentences                            | natural     |
|                                                                                  | I am an expert on the subject                                                    | nonsensical |
|                                                                                  | The information is (almost) common-sense knowledge                               | nonsensical |
|                                                                                  | It is widely known (or taught) around the world                                  | nonsensical |
|                                                                                  | I am not an expert, but have some background knowledge                           | unnatural   |
| It is not directly stated so far, but I can infer it from the previous sentences | I could infer it by combining my background knowledge and the previous sentences | natural     |
|                                                                                  | I could infer it, although I do not have background knowledge on the topic       | natural     |
|                                                                                  | Some of the other sentences in the document supports this statement              | natural     |
|                                                                                  | The same information was stated in one of the previous sentences                 | nonsensical |
|                                                                                  | It is widely known (or taught) around the world                                  | nonsensical |

Table A.2: The options for the reason selection (attribute: Knowledge Awareness, attribute value: *I did not know the information before, but came to know it by reading the previous sentences*)

| Reason 1                                        | Reason 2                                                             | Label     |
|-------------------------------------------------|----------------------------------------------------------------------|-----------|
| It is widely known (or taught) around the world | The information is (almost) common-sense knowledge                   | natural   |
|                                                 | It is highly publicized information                                  | natural   |
|                                                 | I have background knowledge on the topic                             | natural   |
|                                                 | I know it from my personal experience                                | natural   |
|                                                 | I am not familiar with the topic                                     | unnatural |
| I have background knowledge on the topic        | I am an expert on the subject                                        | natural   |
|                                                 | I am not an expert, but have some background knowledge               | natural   |
|                                                 | It is widely known (or taught) around the world                      | natural   |
|                                                 | I know it from my personal experience                                | natural   |
|                                                 | I am not familiar with the topic                                     | unnatural |
| I know it from my personal experience           | I have a similar experience with the stated experience of the author | natural   |
|                                                 | It is widely known (or taught) around the world                      | natural   |
|                                                 | I have background knowledge on the topic                             | natural   |
|                                                 | I am not familiar with the topic                                     | unnatural |
|                                                 | It is a factual information                                          | unnatural |

Table A.3: The options for the reason selection (attribute: Knowledge Awareness, attribute value: *I already knew the information before I read this document*)

| Reason 1                               | Reason 2                                                         | Label       |
|----------------------------------------|------------------------------------------------------------------|-------------|
| I can logically verify the information | The information makes logical sense with my personal experience  | natural     |
|                                        | The information makes logical sense with my background knowledge | natural     |
|                                        | I am familiar with the information                               | natural     |
|                                        | It is not a complete sentence                                    | nonsensical |
|                                        | It is a transition sentence that is meaningless                  | nonsensical |
| I am familiar with the information     | It is widely known (or taught) around the world                  | natural     |
|                                        | I have background knowledge on the topic                         | natural     |
|                                        | I know it from my personal experience                            | natural     |
|                                        | I can logically verify the information                           | natural     |
|                                        | I do not have background knowledge about the topic               | unnatural   |

Table A.4: The options for the reason selection (attribute: Verifiability, attribute value: *I can verify it using my knowledge*)

| Reason 1                                     | Reason 2                                                                              | Label       |
|----------------------------------------------|---------------------------------------------------------------------------------------|-------------|
| It would be easy to find                     | I can find the records to verify it, from short search using a few keywords           | natural     |
|                                              | I can directly copy and paste the sentence, and I would find the records to verify it | natural     |
|                                              | I would find a direct reference to verify it                                          | natural     |
|                                              | It is not a complete sentence                                                         | nonsensical |
|                                              | It is a transition sentence that is meaningless                                       | nonsensical |
| I would find a direct reference to verify it | I would find multiple sources to verify it                                            | natural     |
|                                              | It would be easy to find                                                              | natural     |
|                                              | It is not a complete sentence                                                         | nonsensical |
|                                              | It is a transition sentence that is meaningless                                       | nonsensical |
|                                              | I can interview the people related to it                                              | unnatural   |

Table A.5: The options for the reason selection (attribute: Verifiability, attribute value: *I can verify it by short-time googling*)

| Reason 1                                                          | Reason 2                                                                                 | Label       |
|-------------------------------------------------------------------|------------------------------------------------------------------------------------------|-------------|
| Detailed google search may lead to related records                | I would eventually find direct reference / evidence to verify it                         | natural     |
|                                                                   | I can find related statistics and infer the veracity of the sentence from the statistics | natural     |
|                                                                   | The information may require deeper understanding of the situation                        | natural     |
|                                                                   | It is not a complete sentence                                                            | nonsensical |
|                                                                   | It is a transition sentence that is meaningless                                          | nonsensical |
| The information may require deeper understanding of the situation | Detailed google search may lead to related records                                       | natural     |
|                                                                   | It is not a complete sentence                                                            | nonsensical |
|                                                                   | It is a transition sentence that is meaningless                                          | nonsensical |
|                                                                   | I can find the records to verify it, from short search using a few keywords              | nonsensical |
|                                                                   | I can directly copy and paste of the sentence, and I would find the records to verify it | nonsensical |

Table A.6: The options for the reason selection (attribute: Verifiability, attribute value: *I can verify it by long-time googling*)

| Reason 1                                               | Reason 2                                                                                 | Label       |
|--------------------------------------------------------|------------------------------------------------------------------------------------------|-------------|
| I can interview the people related to it               | I can interview work-related people / insiders                                           | natural     |
|                                                        | I can interview friends / family                                                         | natural     |
|                                                        | I can interview local residents                                                          | natural     |
|                                                        | I could visit related places to obtain the information                                   | natural     |
|                                                        | I can find the records to verify it, from short search using a few keywords              | nonsensical |
| I could visit related places to obtain the information | I can find some related records (e.g., medical record, personal notes)                   | natural     |
|                                                        | I can interview the people related to it                                                 | natural     |
|                                                        | It is a transition sentence that is meaningless                                          | nonsensical |
|                                                        | I can find the records to verify it, from short search using a few keywords              | nonsensical |
|                                                        | I can directly copy and paste of the sentence, and I would find the records to verify it | nonsensical |

Table A.7: The options for the reason selection (attribute: Verifiability, attribute value: *I might find an off-line way to verify it, but it will be very hard*)

| Reason 1                                     | Reason 2                                                                                 | Label       |
|----------------------------------------------|------------------------------------------------------------------------------------------|-------------|
| It is not a factual information              | It is a speculative or hypothetical statement                                            | natural     |
|                                              | It is a vague (or not clear) statement                                                   | natural     |
|                                              | It is a subjective statement                                                             | natural     |
|                                              | I can find the records to verify it, from short search using a few keywords              | nonsensical |
|                                              | I can directly copy and paste of the sentence, and I would find the records to verify it | nonsensical |
| It is a subjective statement                 | It is a personal experience                                                              | natural     |
|                                              | It is a subjective opinion / judgment / interpretation                                   | natural     |
|                                              | It is not a factual information                                                          | natural     |
|                                              | I can find the records to verify it, from short search using a few keywords              | nonsensical |
|                                              | I can directly copy and paste of the sentence, and I would find the records to verify it | nonsensical |
| This sentence gives no information to verify | It is a question                                                                         | natural     |
|                                              | It is not a complete sentence                                                            | natural     |
|                                              | It is a transition sentence that is meaningless                                          | natural     |
|                                              | It is merely a word play or an analogy                                                   | natural     |
|                                              | I can find the records to verify it, from short search using a few keywords              | nonsensical |

Table A.8: The options for the reason selection (attribute: Verifiability, attribute value: *There is no way to verify it*)

| Reason 1                                     | Reason 2                                                                                 | Label       |
|----------------------------------------------|------------------------------------------------------------------------------------------|-------------|
| It is not a factual information              | It is a speculative or hypothetical statement                                            | natural     |
|                                              | It is a vague (or not clear) statement                                                   | natural     |
|                                              | It is a subjective statement                                                             | natural     |
|                                              | I can find the records to verify it, from short search using a few keywords              | nonsensical |
|                                              | I can directly copy and paste of the sentence, and I would find the records to verify it | nonsensical |
| It is a subjective statement                 | It is a personal experience                                                              | natural     |
|                                              | It is a subjective opinion / judgment / interpretation                                   | natural     |
|                                              | It is not a factual information                                                          | natural     |
|                                              | I can find the records to verify it, from short search using a few keywords              | nonsensical |
|                                              | I can directly copy and paste of the sentence, and I would find the records to verify it | nonsensical |
| This sentence gives no information to verify | It is a question                                                                         | natural     |
|                                              | It is not a complete sentence                                                            | natural     |
|                                              | It is a transition sentence that is meaningless                                          | natural     |
|                                              | It is merely a word play or an analogy                                                   | natural     |
|                                              | I can find the records to verify it, from short search using a few keywords              | nonsensical |

Table A.9: The options for the reason selection (attribute: Verifiability, attribute value: *n/a*)

| Reason 1                        | Reason 2                                                                           | Label     |
|---------------------------------|------------------------------------------------------------------------------------|-----------|
| It is not a factual information | It is a speculative or hypothetical statement                                      | natural   |
|                                 | It is a vague (or not clear) statement                                             | natural   |
|                                 | It is a subjective statement                                                       | natural   |
|                                 | It is a famous conflict                                                            | natural   |
|                                 | Some people will disagree on it                                                    | natural   |
| It is a subjective statement    | It is a personal experience                                                        | natural   |
|                                 | It is a subjective opinion / judgment / interpretation                             | natural   |
|                                 | It is not a factual information                                                    | natural   |
|                                 | It is a famous conflict                                                            | natural   |
|                                 | Some people will disagree on it                                                    | natural   |
| It is a famous conflict         | It is a subjective statement                                                       | natural   |
|                                 | It is not a factual information                                                    | natural   |
|                                 | It is a factual information                                                        | unnatural |
|                                 | It is about author's experience                                                    | unnatural |
|                                 | The information is a statement of personal belief                                  | unnatural |
| Some people will disagree on it | It is about controversial topics                                                   | natural   |
|                                 | There are some other opinions that oppose this view that are equally as convincing | natural   |
|                                 | It is not a factual information                                                    | natural   |
|                                 | It is a subjective statement                                                       | natural   |
|                                 | It is a famous conflict                                                            | natural   |

Table A.10: The options for the reason selection (attribute: Disputability, attribute value: *Highly Disputable*)

| Reason 1                        | Reason 2                                                                           | Label     |
|---------------------------------|------------------------------------------------------------------------------------|-----------|
| It is not a factual information | It is a speculative or hypothetical statement                                      | natural   |
|                                 | It is a vague (or not clear) statement                                             | natural   |
|                                 | It is a subjective statement                                                       | natural   |
|                                 | It is a famous conflict                                                            | natural   |
|                                 | Some people will disagree on it                                                    | natural   |
| It is a subjective statement    | It is a personal experience                                                        | natural   |
|                                 | It is a subjective opinion / judgment / interpretation                             | natural   |
|                                 | It is not a factual information                                                    | natural   |
|                                 | It is a famous conflict                                                            | natural   |
|                                 | Some people will disagree on it                                                    | natural   |
| It is a famous conflict         | It is a subjective statement                                                       | natural   |
|                                 | It is not a factual information                                                    | natural   |
|                                 | It is a factual information                                                        | unnatural |
|                                 | It is about author's experience                                                    | unnatural |
|                                 | The information is a statement of personal belief                                  | unnatural |
| Some people will disagree on it | It is about controversial topics                                                   | natural   |
|                                 | There are some other opinions that oppose this view that are equally as convincing | natural   |
|                                 | It is not a factual information                                                    | natural   |
|                                 | It is a subjective statement                                                       | natural   |
|                                 | It is a famous conflict                                                            | natural   |

Table A.11: The options for the reason selection (attribute: Disputability, attribute value: *Disputable*)

| Reason 1                                   | Reason 2                                                     | Label     |
|--------------------------------------------|--------------------------------------------------------------|-----------|
| It is not a factual information            | It is a speculative or hypothetical statement                | natural   |
|                                            | It is a vague (or not clear) statement                       | natural   |
|                                            | It is a subjective statement                                 | natural   |
|                                            | Different views on the subject is possible                   | natural   |
|                                            | Some may think different on some details                     | natural   |
| It is a subjective statement               | It is a personal experience                                  | natural   |
|                                            | It is a subjective opinion / judgment / interpretation       | natural   |
|                                            | It is not a factual information                              | natural   |
|                                            | Different views on the subject is possible                   | natural   |
|                                            | Some may think different on some details                     | natural   |
| Different views on the subject is possible | Many would agree with, but some would still argue against it | natural   |
|                                            | It is a subjective statement                                 | natural   |
|                                            | It is not a factual information                              | natural   |
|                                            | Some may think different on some details                     | natural   |
|                                            | It is a factual information                                  | unnatural |
| Some may think different on some details   | It is a subjective statement                                 | natural   |
|                                            | It is not a factual information                              | natural   |
|                                            | Different views on the subject is possible                   | natural   |
|                                            | It is a factual information                                  | unnatural |
|                                            | It is a famous conflict                                      | unnatural |

Table A.12: The options for the reason selection (attribute: Disputability, attribute value: *Weakly Disputable*)

| Reason 1                                                  | Reason 2                                            | Label       |
|-----------------------------------------------------------|-----------------------------------------------------|-------------|
| It is a factual information                               | It is (almost) a common sense                       | natural     |
|                                                           | The information is about a historic or public event | natural     |
|                                                           | It is a fact                                        | natural     |
|                                                           | It is close to a fact                               | natural     |
|                                                           | It can easily be verified                           | natural     |
| It is personal statement                                  | It is about author's experience                     | natural     |
|                                                           | The information is a statement of personal belief   | natural     |
|                                                           | It is a fact                                        | unnatural   |
|                                                           | It is close to a fact                               | unnatural   |
|                                                           | It can easily be verified                           | unnatural   |
| This sentence does not contain any meaningful information | It is a question                                    | natural     |
|                                                           | It is not a complete sentence                       | natural     |
|                                                           | It is a transition sentence that is meaningless     | natural     |
|                                                           | It is merely a word play or an analogy              | natural     |
|                                                           | It is personal statement                            | nonsensical |

Table A.13: The options for the reason selection (attribute: Disputability, attribute value: *Not Disputable*)

| Reason 1                                                        | Reason 2                                                        | Label       |
|-----------------------------------------------------------------|-----------------------------------------------------------------|-------------|
| It is a factual information                                     | It is (almost) a common sense                                   | natural     |
|                                                                 | The information is about a historic or public event             | natural     |
|                                                                 | It is a fact                                                    | natural     |
|                                                                 | It is close to a fact                                           | natural     |
|                                                                 | It can easily be verified                                       | natural     |
| It is not a factual information, but I agree with the statement | It is a speculative or hypothetical statement                   | natural     |
|                                                                 | It is a vague (or not clear) statement                          | natural     |
|                                                                 | It is a subjective statement, but I agree with the statement    | natural     |
|                                                                 | It is a reasonable argument                                     | natural     |
|                                                                 | It is a fact                                                    | nonsensical |
| It is a subjective statement, but I agree with the statement    | It is a personal experience                                     | natural     |
|                                                                 | It is a subjective opinion / judgment / interpretation          | natural     |
|                                                                 | It is a reasonable argument                                     | natural     |
|                                                                 | It is a fact                                                    | nonsensical |
|                                                                 | It can easily be verified                                       | unnatural   |
| It is a reasonable argument                                     | The author / source has sufficient credibility                  | natural     |
|                                                                 | It is supported by solid arguments or evidence                  | natural     |
|                                                                 | It presents logical consistency                                 | natural     |
|                                                                 | It contains no questionable details                             | natural     |
|                                                                 | It is not a factual information, but I agree with the statement | natural     |

Table A.14: The options for the reason selection (attribute: Acceptance, attribute value: *Strong Accept*)

| Reason 1                                                        | Reason 2                                                        | Label       |
|-----------------------------------------------------------------|-----------------------------------------------------------------|-------------|
| It is a factual information                                     | It is (almost) a common sense                                   | natural     |
|                                                                 | The information is about a historic or public event             | natural     |
|                                                                 | It is a fact                                                    | natural     |
|                                                                 | It is close to a fact                                           | natural     |
|                                                                 | It can easily be verified                                       | natural     |
| It is not a factual information, but I agree with the statement | It is a speculative or hypothetical statement                   | natural     |
|                                                                 | It is a vague (or not clear) statement                          | natural     |
|                                                                 | It is a subjective statement, but I agree with the statement    | natural     |
|                                                                 | It is a reasonable argument                                     | natural     |
|                                                                 | It is a fact                                                    | nonsensical |
| It is a subjective statement, but I agree with the statement    | It is a personal experience                                     | natural     |
|                                                                 | It is a subjective opinion / judgment / interpretation          | natural     |
|                                                                 | It is a reasonable argument                                     | natural     |
|                                                                 | It is a fact                                                    | nonsensical |
|                                                                 | It can easily be verified                                       | unnatural   |
| It is a reasonable argument                                     | The author / source has sufficient credibility                  | natural     |
|                                                                 | It is supported by solid arguments or evidence                  | natural     |
|                                                                 | It presents logical consistency                                 | natural     |
|                                                                 | It contains no questionable details                             | natural     |
|                                                                 | It is not a factual information, but I agree with the statement | natural     |

Table A.15: The options for the reason selection (attribute: Acceptance, attribute value: *Accept*)



| Reason 1                                                                 | Reason 2                                                                 | Label       |
|--------------------------------------------------------------------------|--------------------------------------------------------------------------|-------------|
| It is a factual information                                              | The information is about a historic or public event                      | natural     |
|                                                                          | It is a fact                                                             | natural     |
|                                                                          | It is close to a fact                                                    | natural     |
|                                                                          | It is (almost) a common sense                                            | natural     |
|                                                                          | It can easily be verified                                                | natural     |
| It is not a factual information, but I somewhat agree with the statement | It is a speculative or hypothetical statement                            | natural     |
|                                                                          | It is a vague (or not clear) statement                                   | natural     |
|                                                                          | It is a subjective statement, but I somewhat agree with the statement    | natural     |
|                                                                          | I do not strongly support this, but I have no reason to reject it        | natural     |
|                                                                          | It is a fact                                                             | nonsensical |
| It is a subjective statement, but I somewhat agree with the statement    | It is a personal experience                                              | natural     |
|                                                                          | It is a subjective opinion / judgment / interpretation                   | natural     |
|                                                                          | I do not strongly support this, but I have no reason to reject it        | natural     |
|                                                                          | It is a fact                                                             | nonsensical |
|                                                                          | It can easily be verified                                                | unnatural   |
| I do not strongly support this, but I have no reason to reject it        | The author / source has sufficient credibility                           | natural     |
|                                                                          | It presents logical consistency                                          | natural     |
|                                                                          | There is no counter evidence to reject it                                | natural     |
|                                                                          | It is not a factual information, but I somewhat agree with the statement | natural     |
|                                                                          | It is a fact                                                             | nonsensical |

Table A.16: The options for the reason selection (attribute: Acceptance, attribute value: *Weak Accept*)

| Reason 1                                                                | Reason 2                                                                    | Label       |
|-------------------------------------------------------------------------|-----------------------------------------------------------------------------|-------------|
| It is not a factual information                                         | It is a speculative or hypothetical statement                               | natural     |
|                                                                         | It is a vague (or not clear) statement                                      | natural     |
|                                                                         | It's a subjective statement, therefore I'd neither accept nor reject it     | natural     |
|                                                                         | I don't have enough information to judge                                    | natural     |
|                                                                         | It is a fact                                                                | nonsensical |
| It's a subjective statement, therefore I'd neither accept nor reject it | It is a personal experience                                                 | natural     |
|                                                                         | It is a subjective opinion / judgment / interpretation                      | natural     |
|                                                                         | I don't have enough information to judge                                    | natural     |
|                                                                         | It is a fact                                                                | nonsensical |
|                                                                         | It can easily be verified                                                   | unnatural   |
| I don't have enough information to judge                                | I cannot reliably judge it in any meaningful way due to the lack of context | natural     |
|                                                                         | I don't have enough background knowledge to judge                           | natural     |
|                                                                         | It is not a factual information                                             | natural     |
|                                                                         | It's a subjective statement, therefore I'd neither accept nor reject it     | natural     |
|                                                                         | The information is (almost) common-sense knowledge                          | nonsensical |
| This sentence gives no information to judge                             | It is a question                                                            | natural     |
|                                                                         | It is not a complete sentence                                               | natural     |
|                                                                         | It is a transition sentence that is meaningless                             | natural     |
|                                                                         | It is merely a word play or an analogy                                      | natural     |
|                                                                         | I can find the records to verify it, from short search using a few keywords | nonsensical |

Table A.17: The options for the reason selection (attribute: Acceptance, attribute value: *Hard to Judge*)

| Reason 1                                                               | Reason 2                                                                          | Label   |
|------------------------------------------------------------------------|-----------------------------------------------------------------------------------|---------|
| It is not a factual information                                        | It is a speculative or hypothetical statement                                     | natural |
|                                                                        | It is a vague (or not clear) statement                                            | natural |
|                                                                        | It is a subjective statement, and I do not agree with the statement               | natural |
|                                                                        | It is not a reasonable argument, and I do not agree with the statement            | natural |
|                                                                        | I do not like the way the author describes the information                        | natural |
| It is a subjective statement, and I do not agree with the statement    | It is a personal experience                                                       | natural |
|                                                                        | It is a subjective opinion / judgment / interpretation                            | natural |
|                                                                        | It is a biased statement                                                          | natural |
|                                                                        | It is controversial and some would not agree with it                              | natural |
|                                                                        | I do not like the way the author describes the information                        | natural |
| It is not a reasonable argument, and I do not agree with the statement | The author / source has insufficient credibility                                  | natural |
|                                                                        | It is not supported by solid arguments or evidence                                | natural |
|                                                                        | It lacks logical consistency                                                      | natural |
|                                                                        | It contains questionable details                                                  | natural |
|                                                                        | I do not like the way the author describes the information                        | natural |
| I do not like the way the author describes the information             | It sounds like the author is exaggerating                                         | natural |
|                                                                        | It is stated like a fact but it is not a fact                                     | natural |
|                                                                        | It is a mixture of opinion and facts designed for a disguise or a dramatic effect | natural |
|                                                                        | It is an oversimplification                                                       | natural |
|                                                                        | The author is utilizing rhetoric devices to elicit emotional reaction             | natural |

Table A.18: The options for the reason selection (attribute: Acceptance, attribute value: *Weak Reject*)

| Reason 1                                                               | Reason 2                                                                          | Label   |
|------------------------------------------------------------------------|-----------------------------------------------------------------------------------|---------|
| It is not a factual information                                        | It is a speculative or hypothetical statement                                     | natural |
|                                                                        | It is a vague (or not clear) statement                                            | natural |
|                                                                        | It is a subjective statement, and I do not agree with the statement               | natural |
|                                                                        | It is not a reasonable argument, and I do not agree with the statement            | natural |
|                                                                        | I do not like the way the author describes the information                        | natural |
| It is a subjective statement, and I do not agree with the statement    | It is a personal experience                                                       | natural |
|                                                                        | It is a subjective opinion / judgment / interpretation                            | natural |
|                                                                        | It is a biased statement                                                          | natural |
|                                                                        | It is controversial and some would not agree with it                              | natural |
|                                                                        | I do not like the way the author describes the information                        | natural |
| It is not a reasonable argument, and I do not agree with the statement | The author / source has insufficient credibility                                  | natural |
|                                                                        | It is not supported by solid arguments or evidence                                | natural |
|                                                                        | It lacks logical consistency                                                      | natural |
|                                                                        | It contains questionable details                                                  | natural |
|                                                                        | I do not like the way the author describes the information                        | natural |
| I do not like the way the author describes the information             | It sounds like the author is exaggerating                                         | natural |
|                                                                        | It is stated like a fact but it is not a fact                                     | natural |
|                                                                        | It is a mixture of opinion and facts designed for a disguise or a dramatic effect | natural |
|                                                                        | It is an oversimplification                                                       | natural |
|                                                                        | The author is utilizing rhetoric devices to elicit emotional reaction             | natural |

Table A.19: The options for the reason selection (attribute: Acceptance, attribute value: *Reject*)

| Reason 1                                                               | Reason 2                                                                          | Label   |
|------------------------------------------------------------------------|-----------------------------------------------------------------------------------|---------|
| It is not a factual information                                        | It is a speculative or hypothetical statement                                     | natural |
|                                                                        | It is a vague (or not clear) statement                                            | natural |
|                                                                        | It is a subjective statement, and I do not agree with the statement               | natural |
|                                                                        | It is not a reasonable argument, and I do not agree with the statement            | natural |
|                                                                        | I do not like the way the author describes the information                        | natural |
| It is a subjective statement, and I do not agree with the statement    | It is a personal experience                                                       | natural |
|                                                                        | It is a subjective opinion / judgment / interpretation                            | natural |
|                                                                        | It is a biased statement                                                          | natural |
|                                                                        | It is controversial and some would not agree with it                              | natural |
|                                                                        | I do not like the way the author describes the information                        | natural |
| It is not a reasonable argument, and I do not agree with the statement | The author / source has insufficient credibility                                  | natural |
|                                                                        | It is not supported by solid arguments or evidence                                | natural |
|                                                                        | It lacks logical consistency                                                      | natural |
|                                                                        | It contains questionable details                                                  | natural |
|                                                                        | I do not like the way the author describes the information                        | natural |
| I do not like the way the author describes the information             | It sounds like the author is exaggerating                                         | natural |
|                                                                        | It is stated like a fact but it is not a fact                                     | natural |
|                                                                        | It is a mixture of opinion and facts designed for a disguise or a dramatic effect | natural |
|                                                                        | It is an oversimplification                                                       | natural |
|                                                                        | The author is utilizing rhetoric devices to elicit emotional reaction             | natural |

Table A.20: The options for the reason selection (attribute: Acceptance, attribute value: *Strong Reject*)
